# Supplementary material
Source: PubMed Central journal article supplement (PMC1896118)

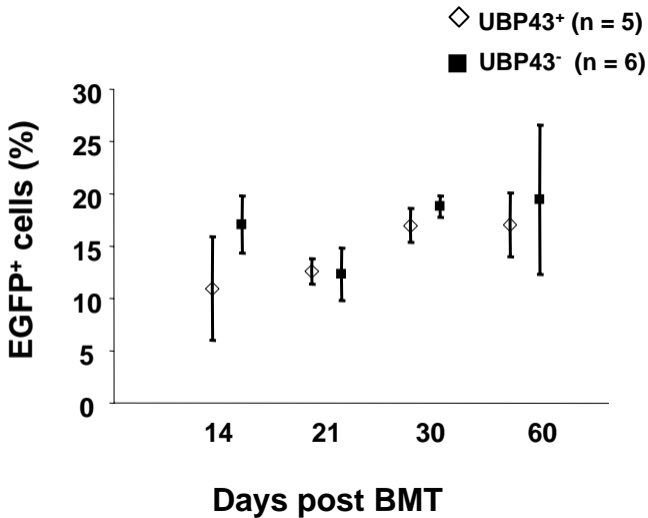

Supplement: blood_blood-2006-07-033209_1.pdf [file blood_blood-2006-07-033209_1.pdf]

**A**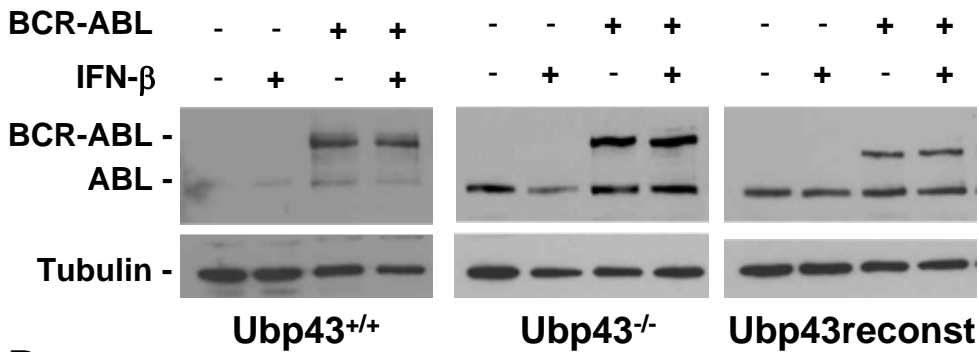**B**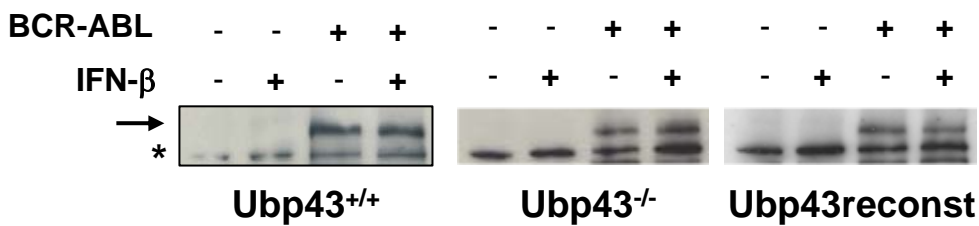

Supplement: blood_blood-2006-07-033209_2.pdf [file blood_blood-2006-07-033209_2.pdf]
